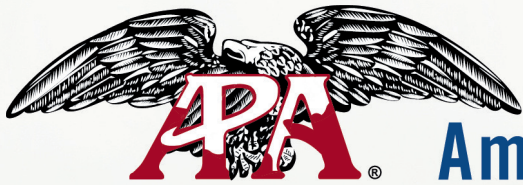

**American Professional Agency**

LEADERS IN MEDICAL PROFESSIONAL LIABILITY INSURANCE

# Are You Protected Against Cyber-Attacks?

## Liability Insurance for Psychiatrists

**Ask about a  
Cyber  
Endorsement**

**Scan for a Quote**

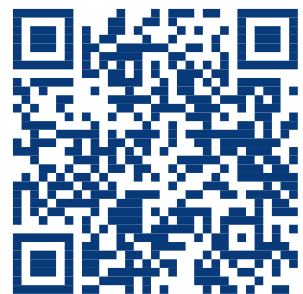

**AmericanProfessional.com**

Endorsed By

AMERICAN  
PSYCHIATRIC  
ASSOCIATION

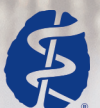

Source: http://ajp.psychiatryonline.org/doi/suppl/10.1176/ajp.2024.181.issue-3/suppl_file/back.pdf
