# The American Journal of Psychiatry

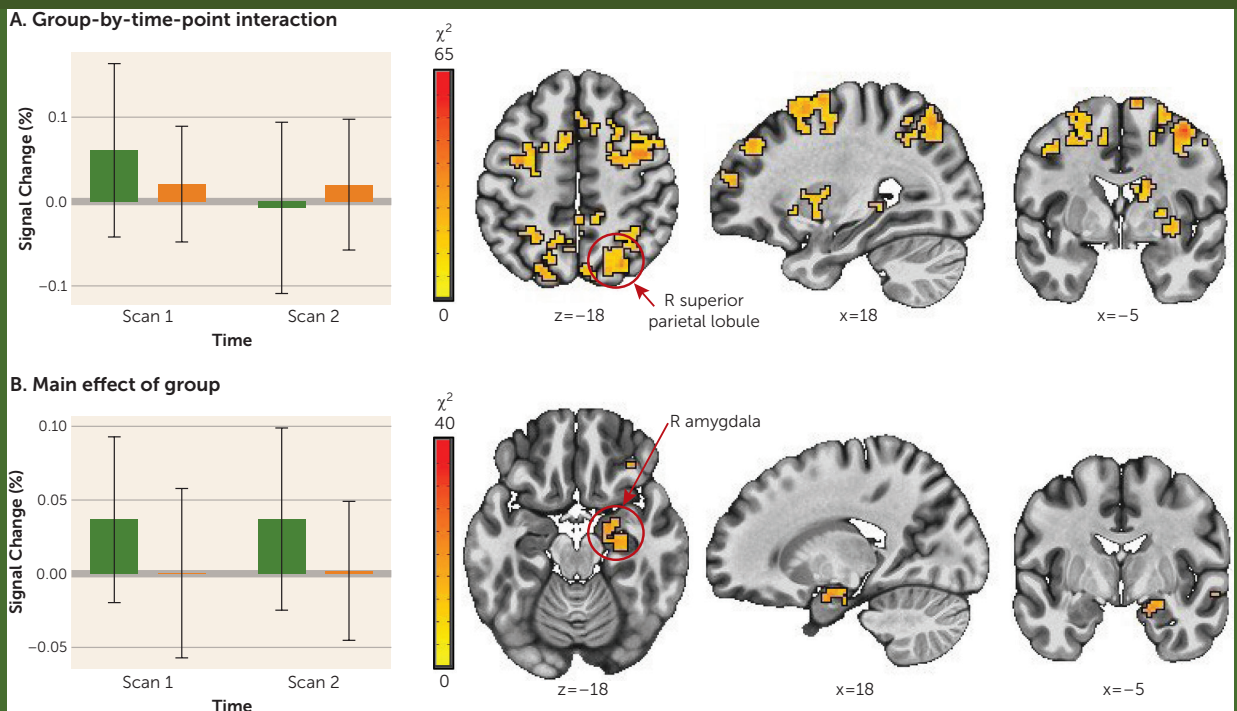

Normalization of Fronto-Parietal Activation by Cognitive-Behavioral Therapy in Unmedicated Pediatric Patients With Anxiety Disorders

Intergenerational Effects of the Fast Track Intervention on Next-Generation Child Outcomes

Treatment Response Prediction in Major Depressive Disorder Using Multimodal MRI and Clinical Data

Cognitive Outcomes After Antidepressant Pharmacotherapy for Late-Life Depression
